# Supplementary material for: RON receptor tyrosine kinase as a critical determinant in promoting tumorigenic behaviors of bladder cancer cells through regulating MMP12 and HIF-2α pathways
Source: PubMed Central journal article supplement (PMC11574271; doi:10.1038/s41419-024-07245-w), 2024-11-19

Figure1

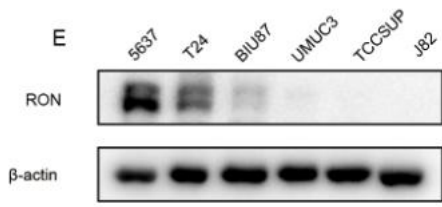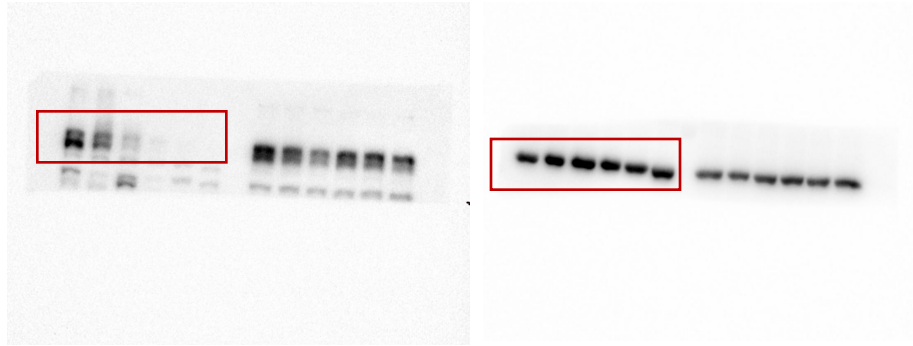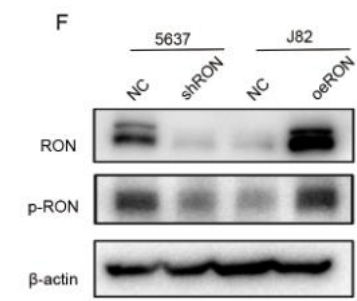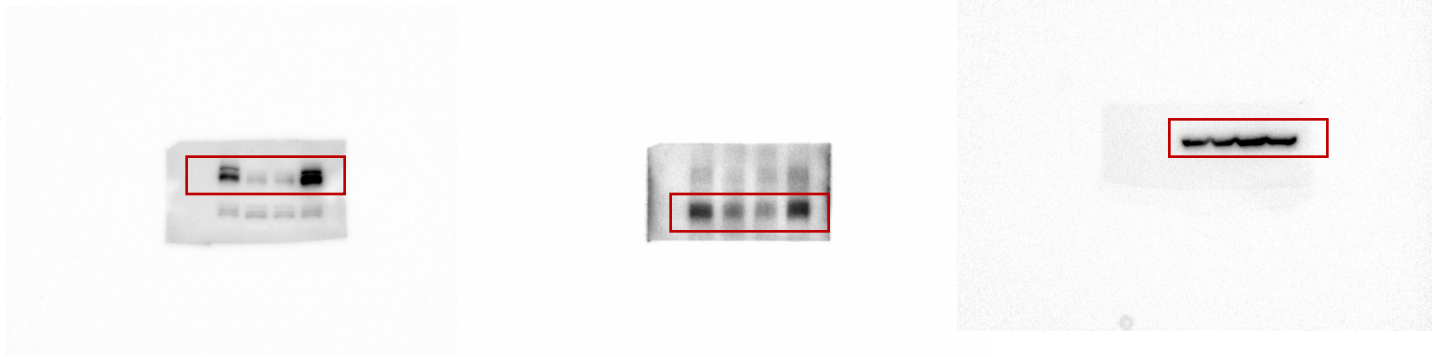

Figure1

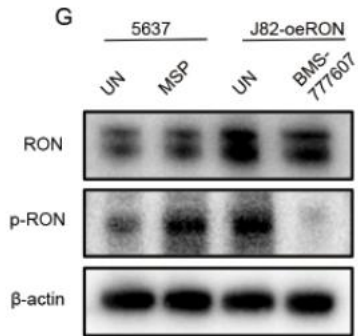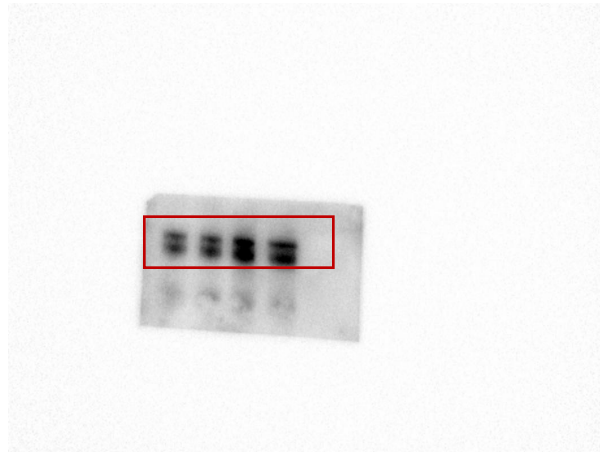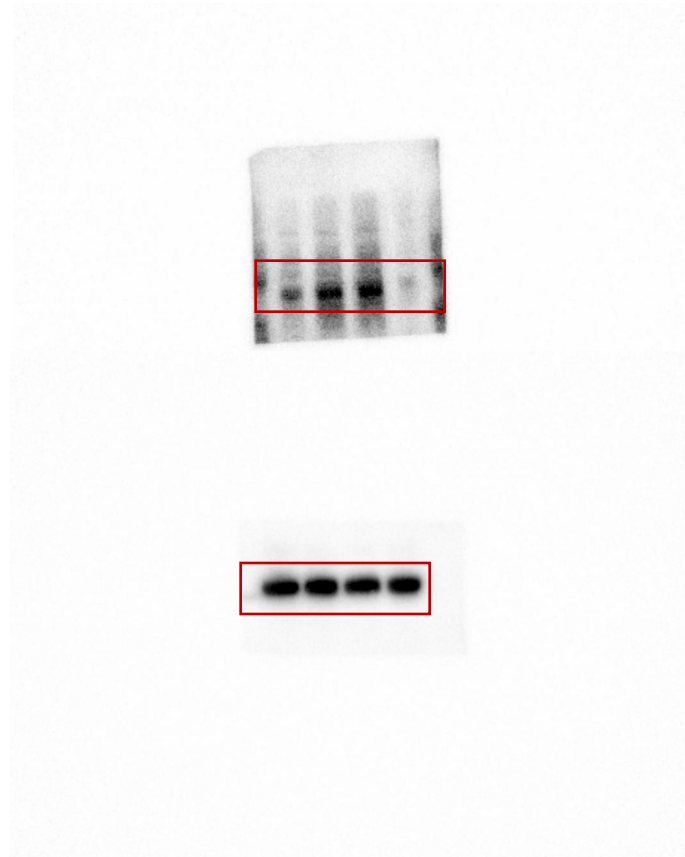

Figure2

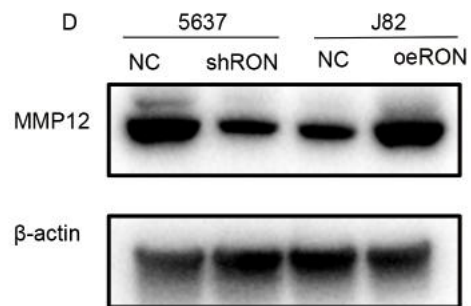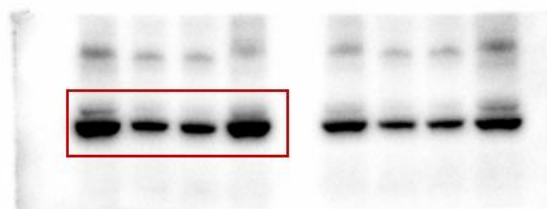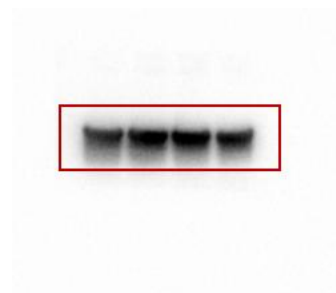

Figure3

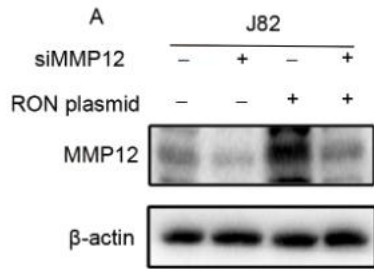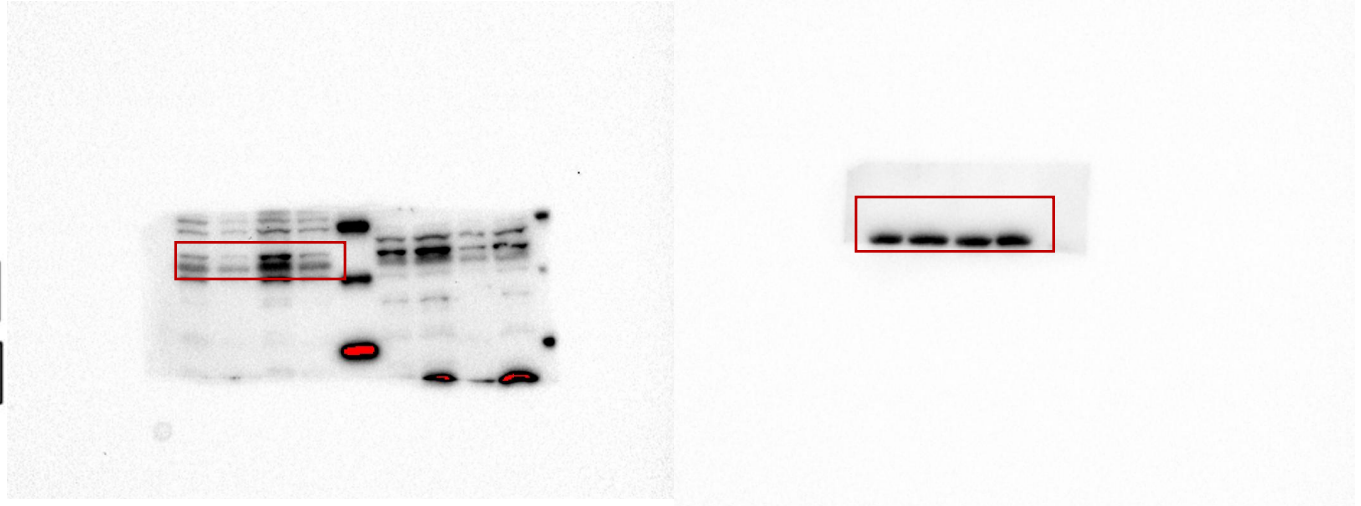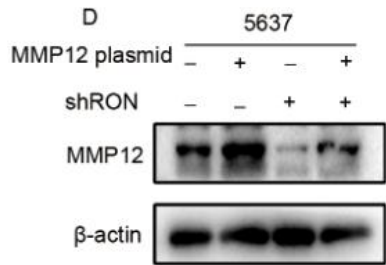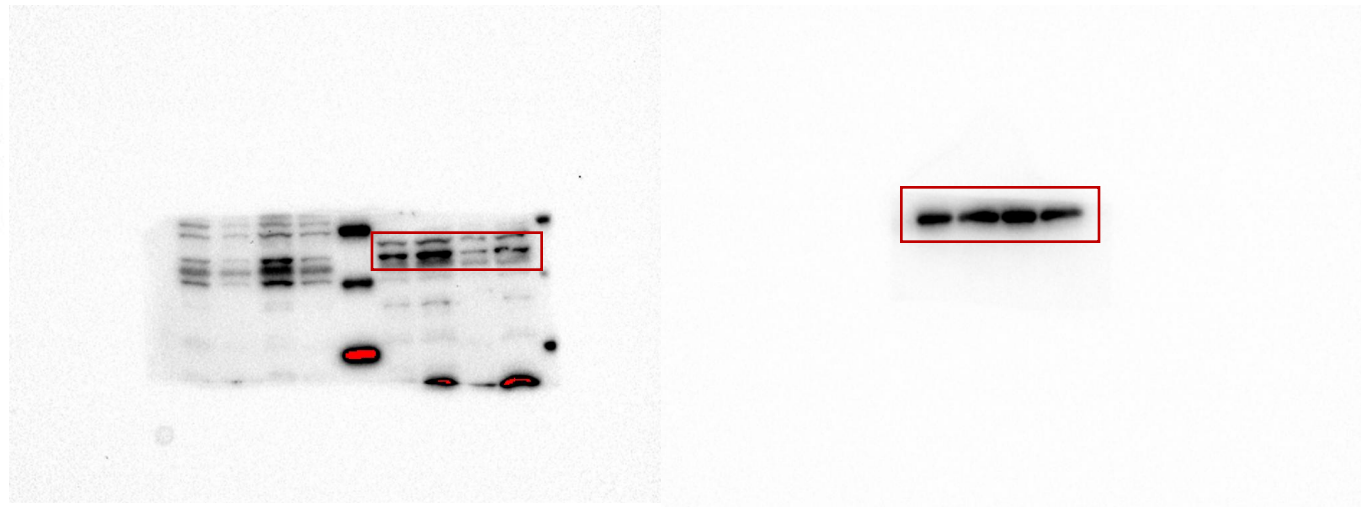

Figure3

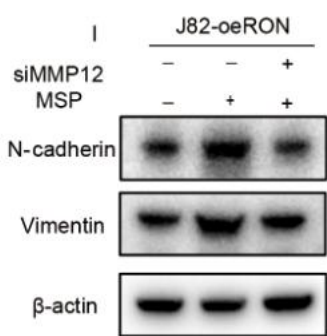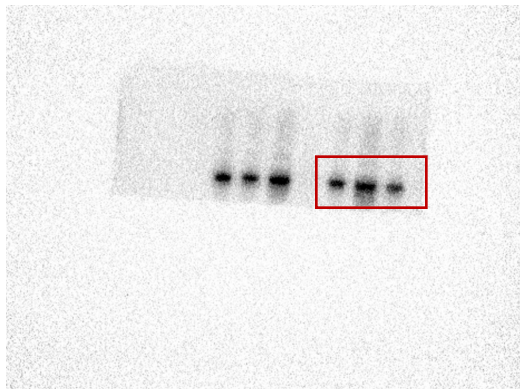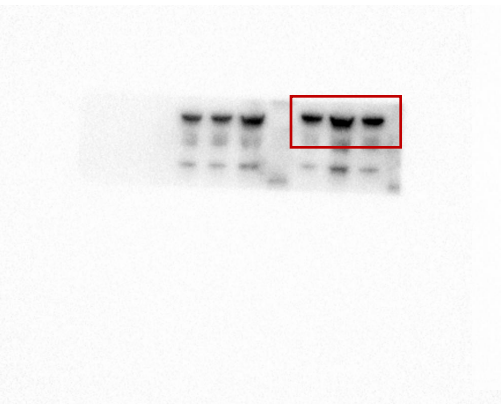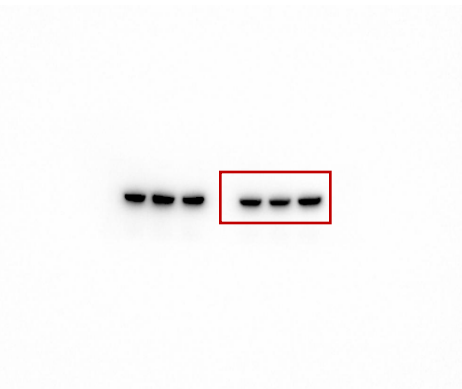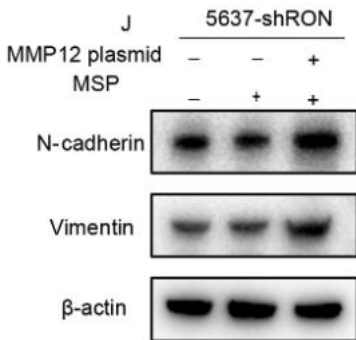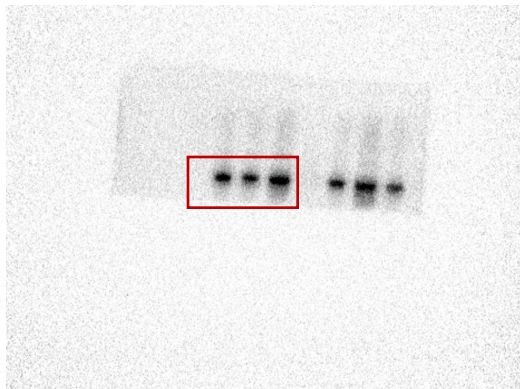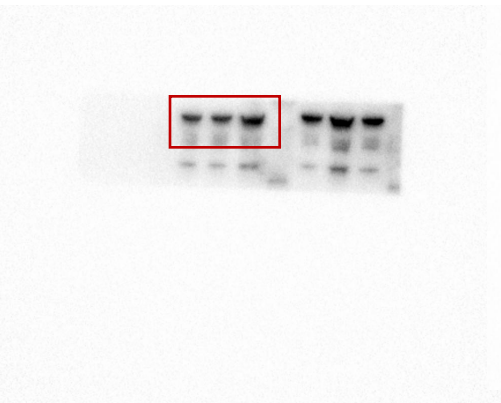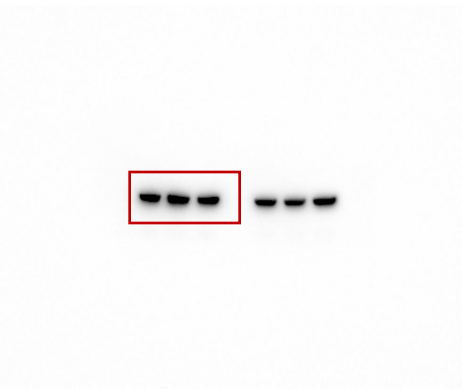

Figure 4

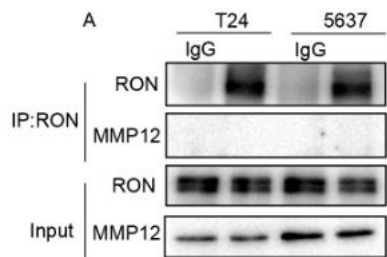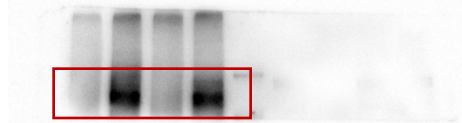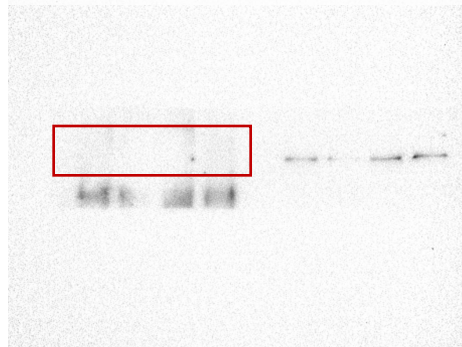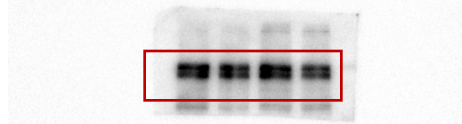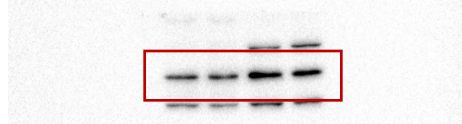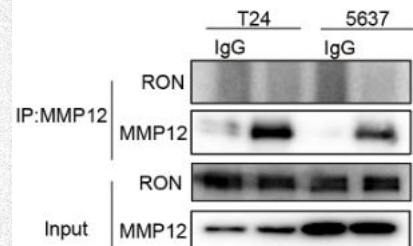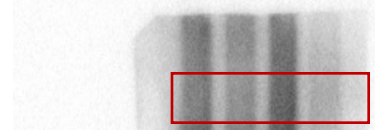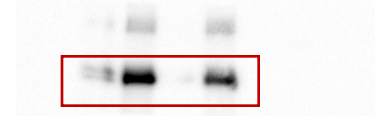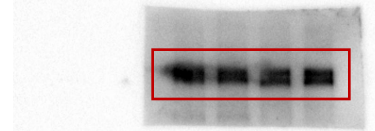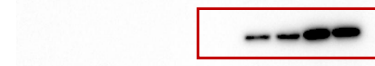

Figure 4

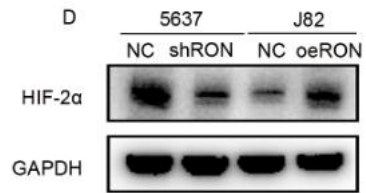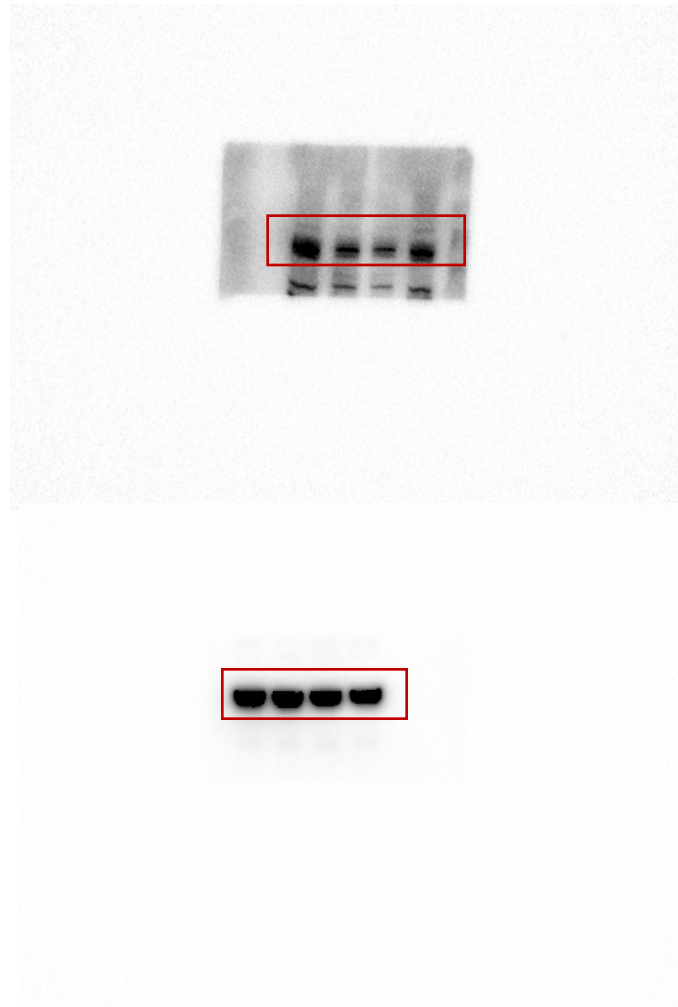

Figure 4

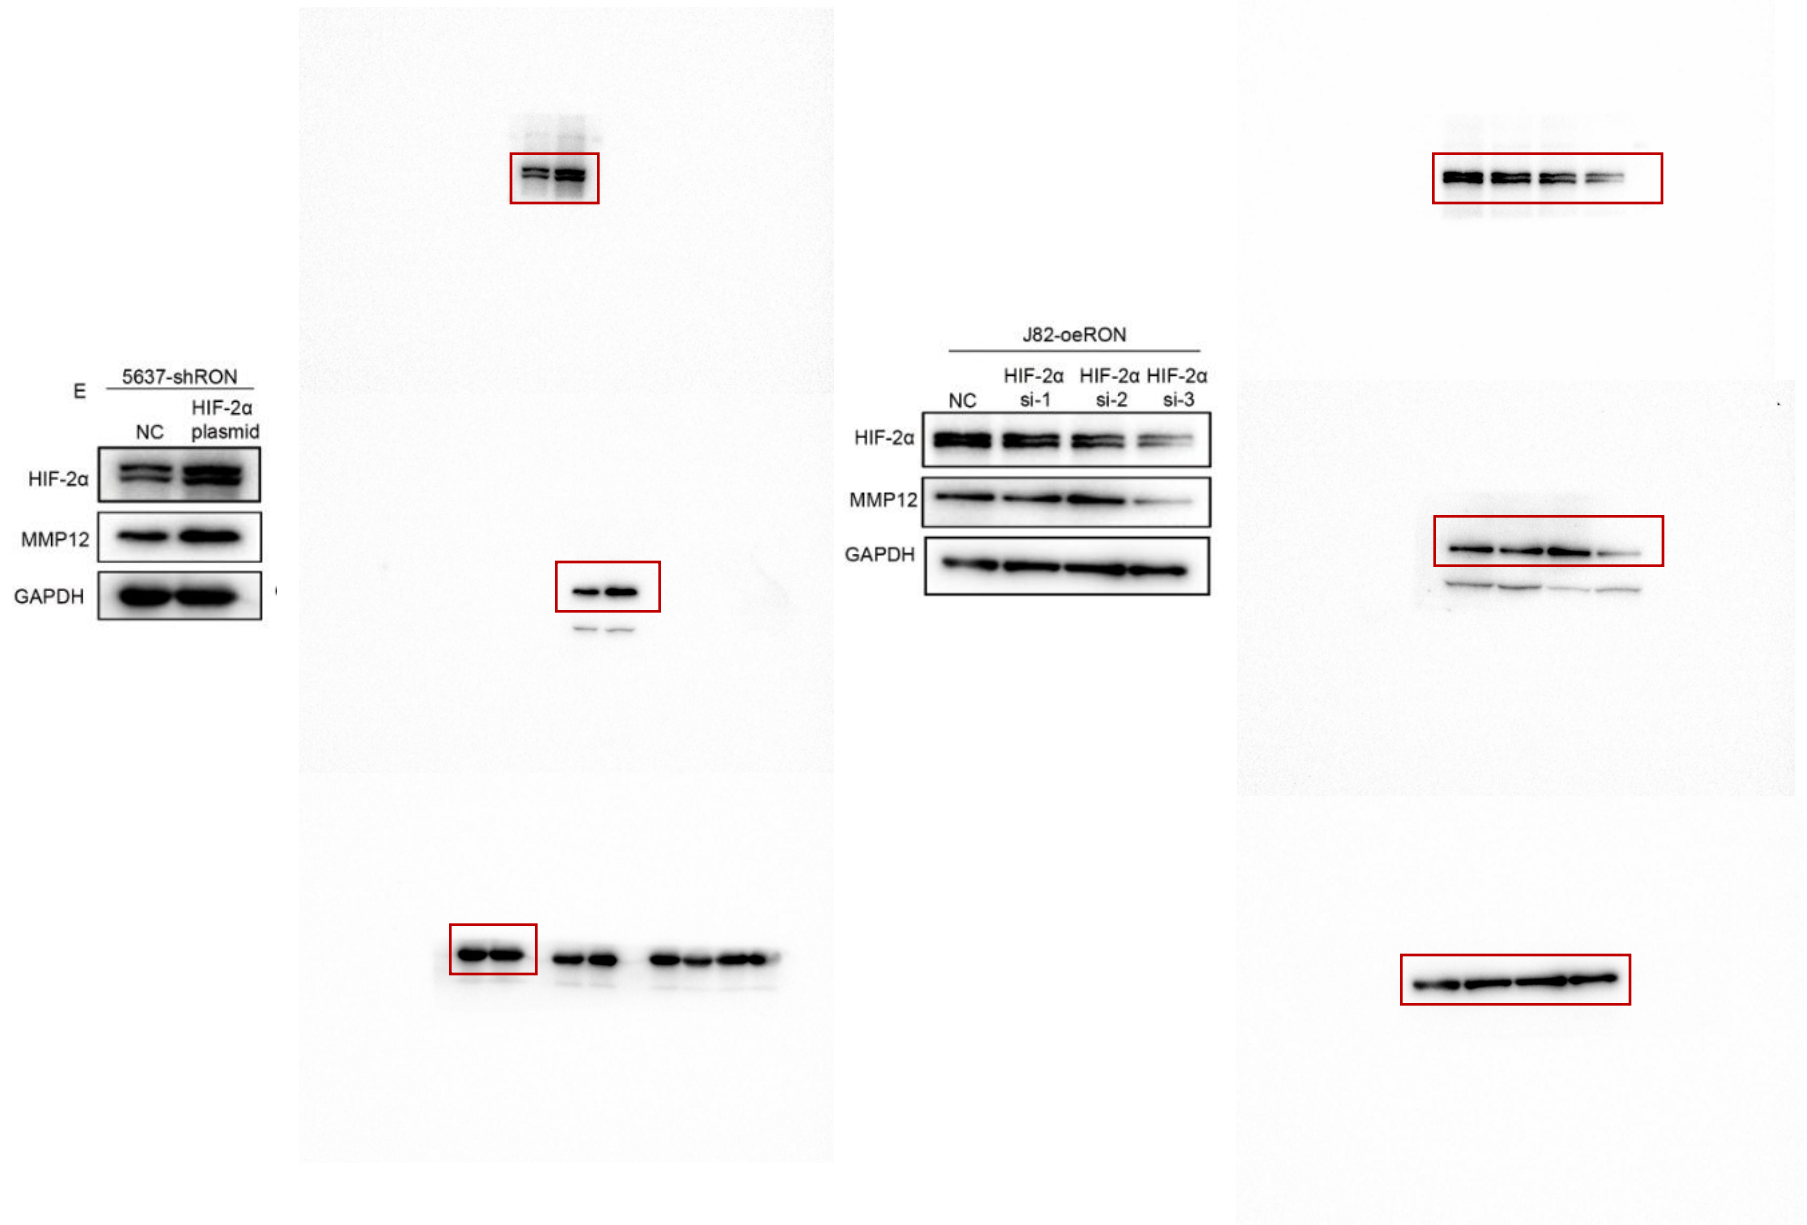



Figure 4

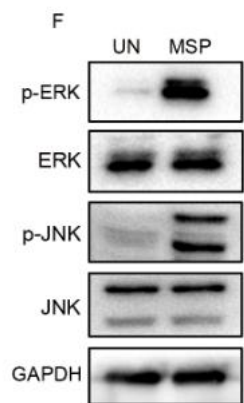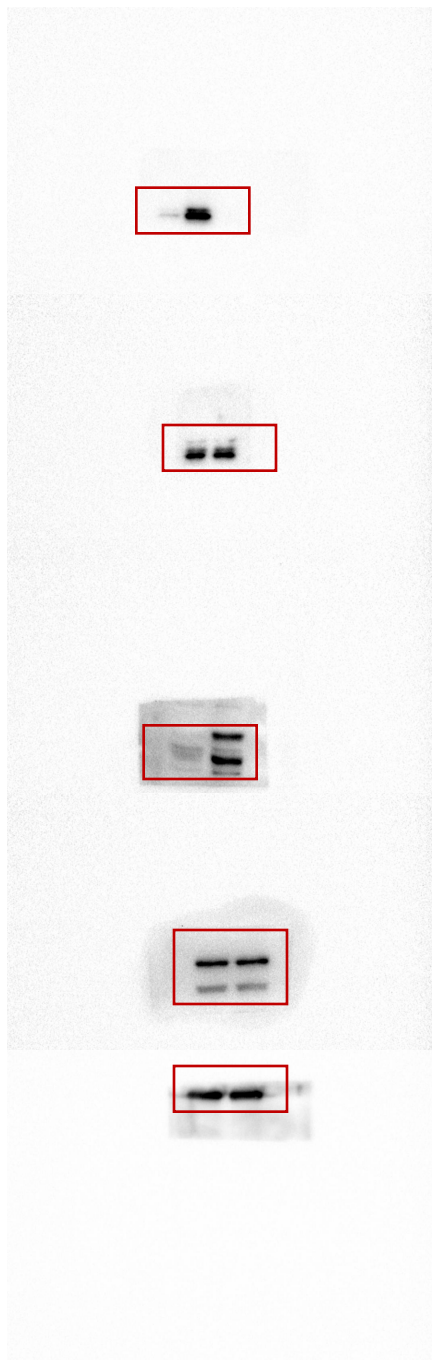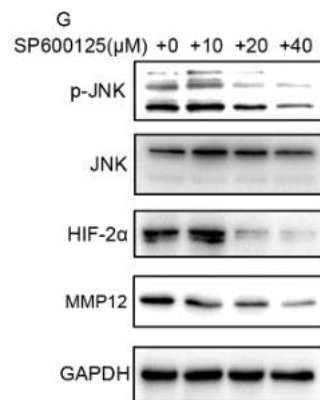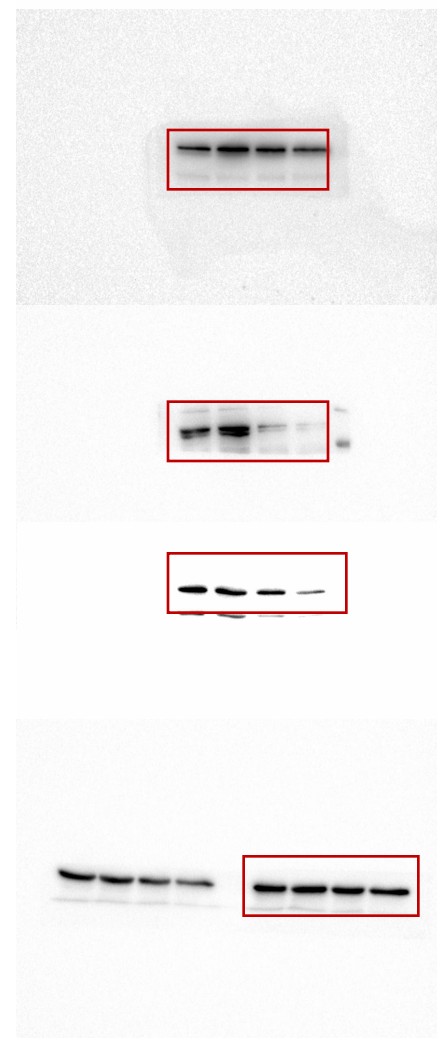

Figure 4

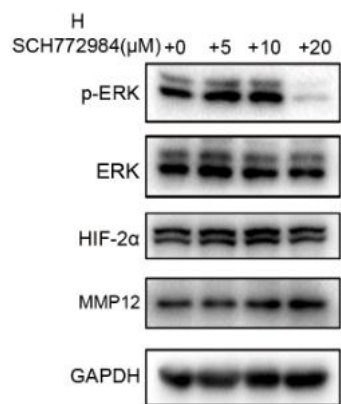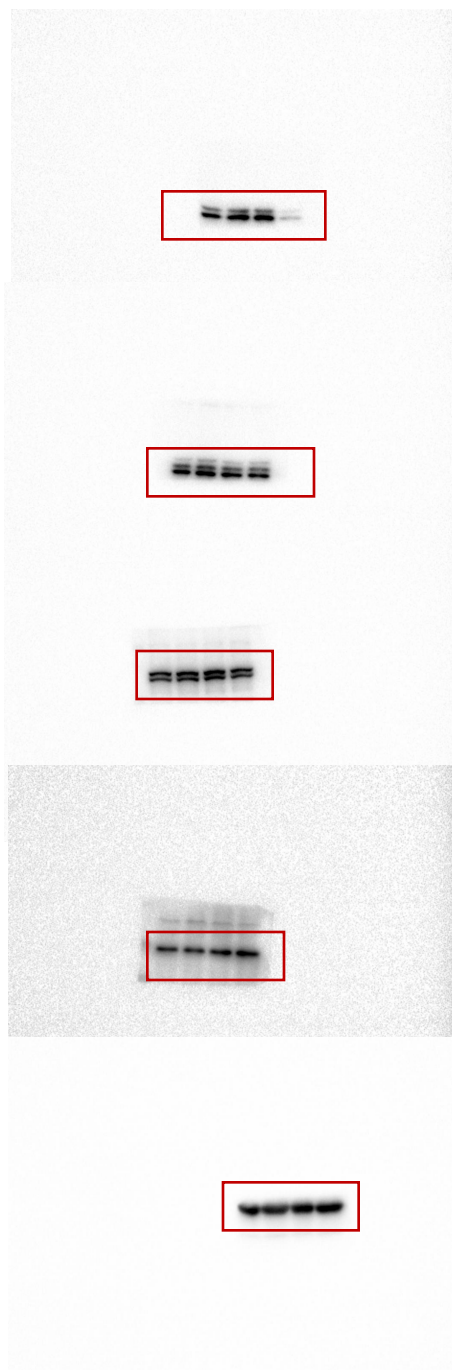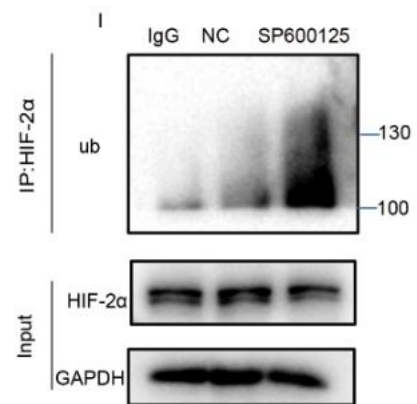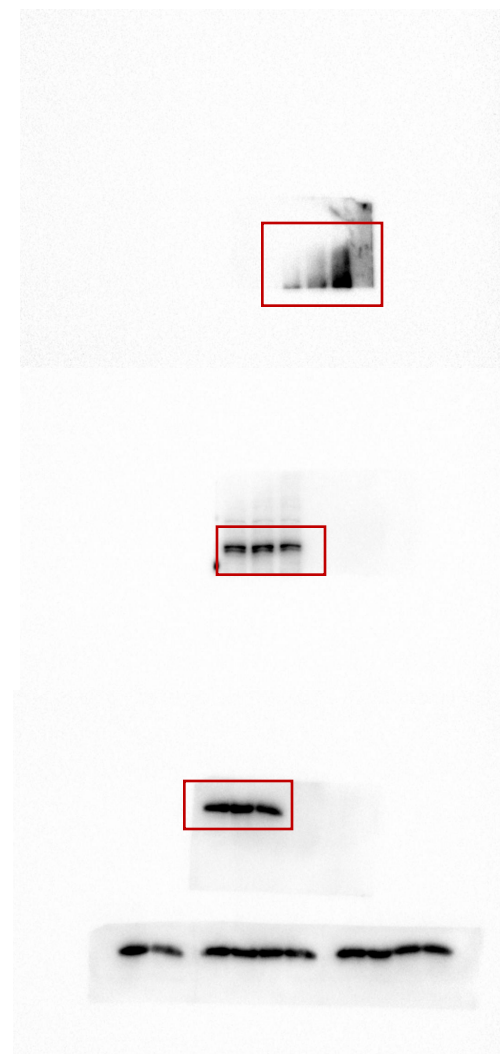

Figure 5

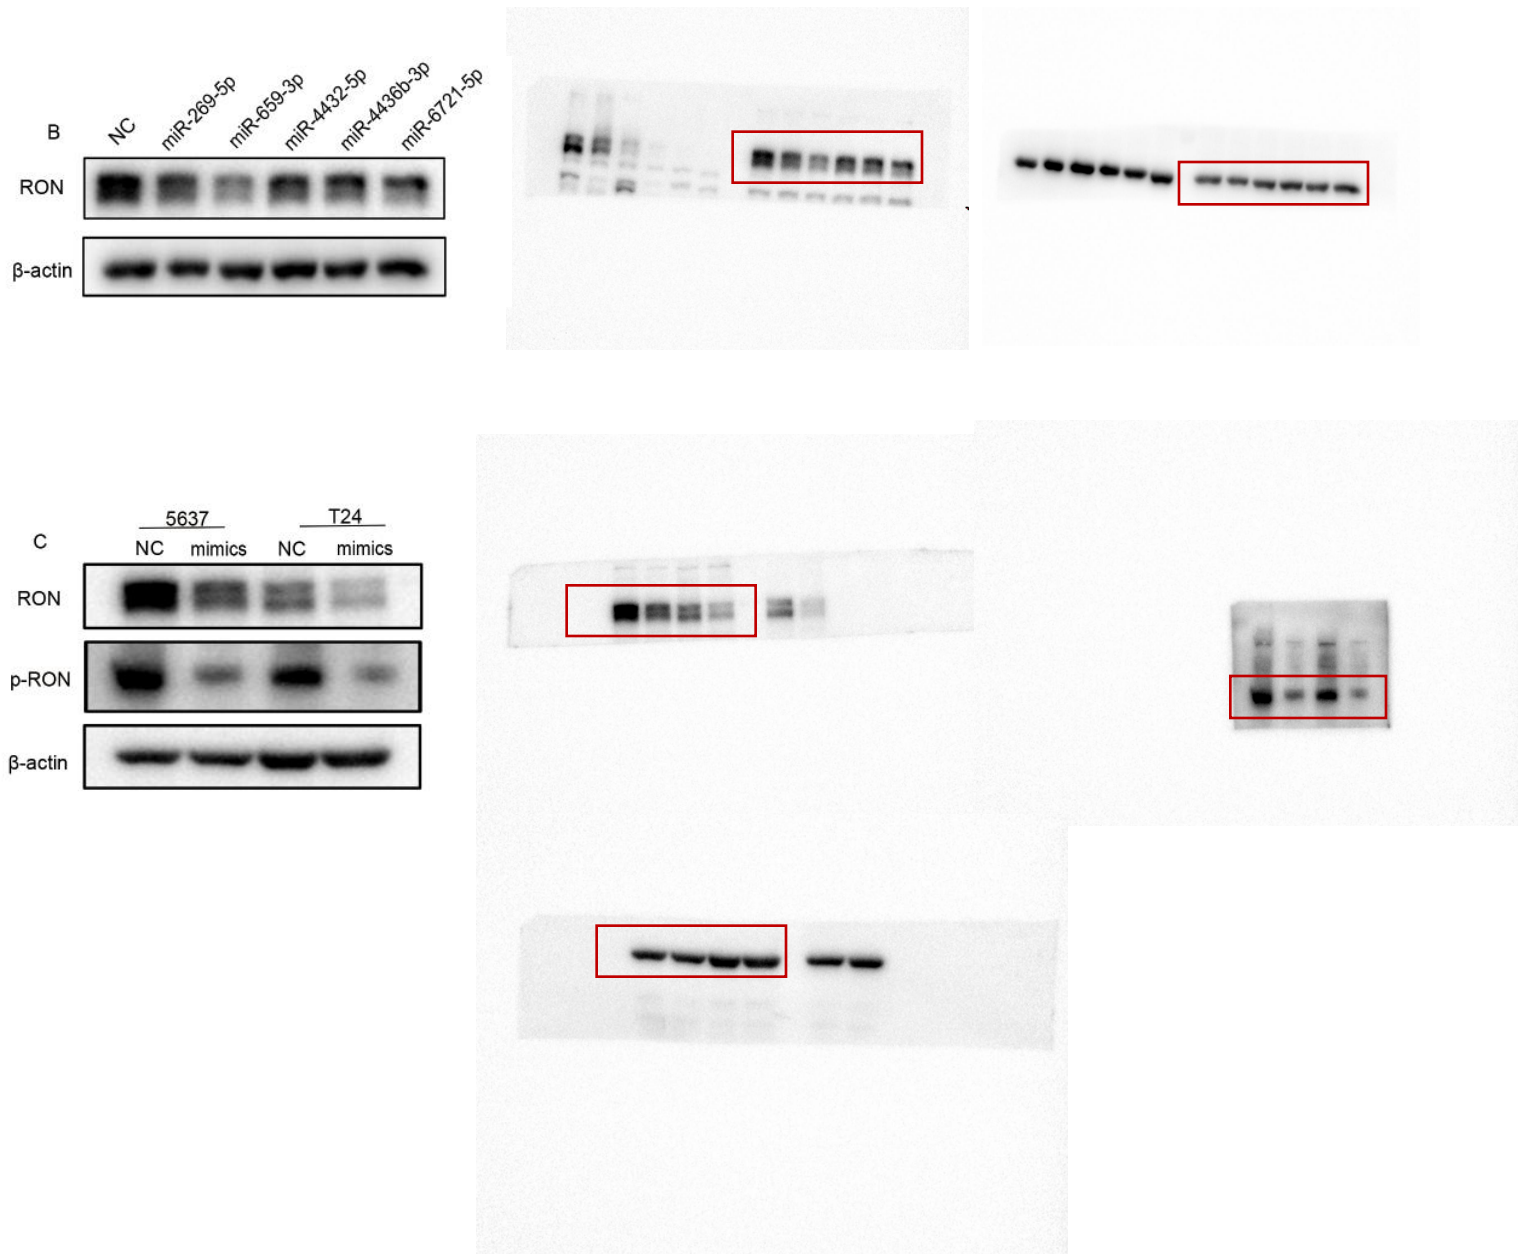

Figure 6

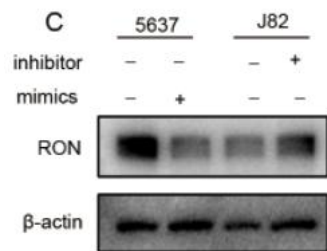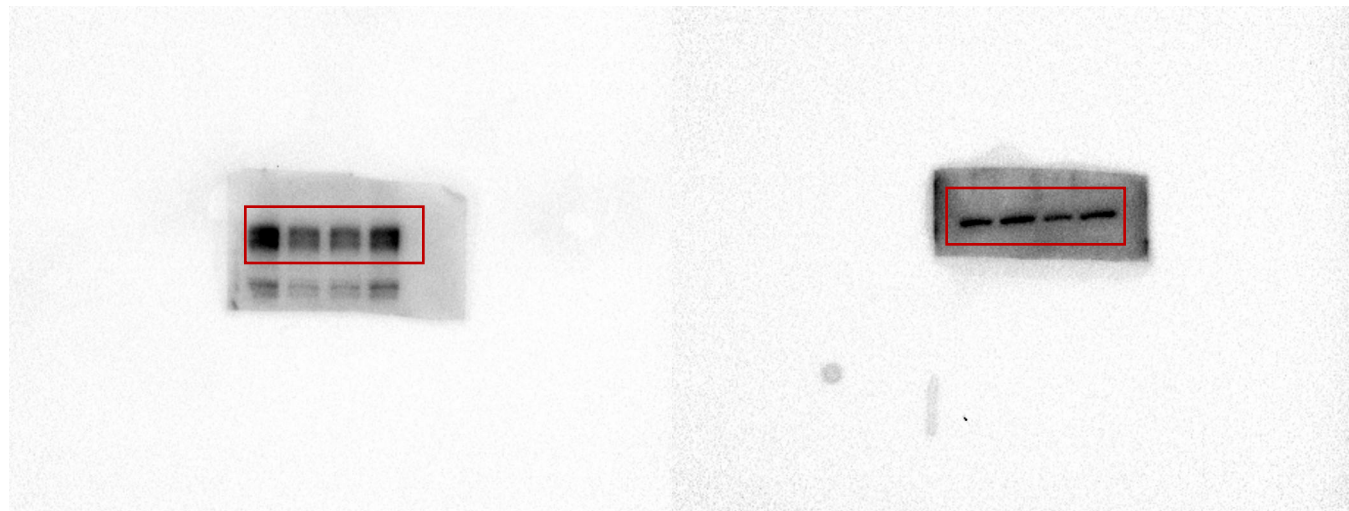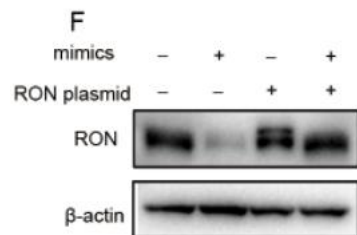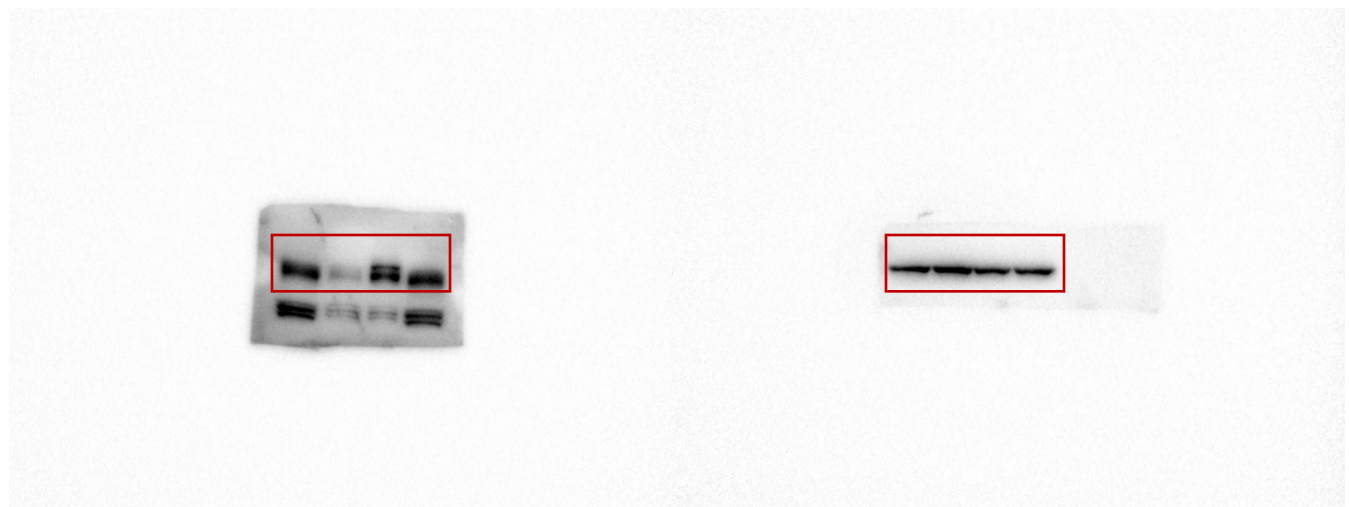

# Supplementary Figure 1

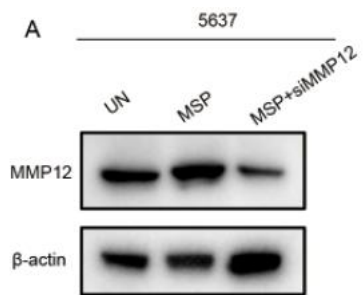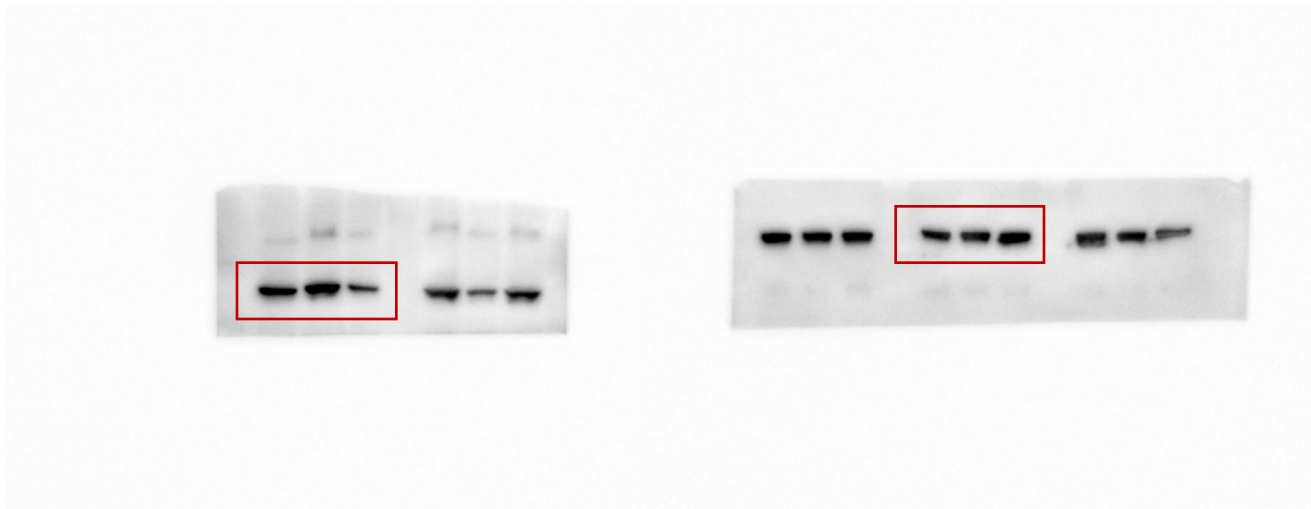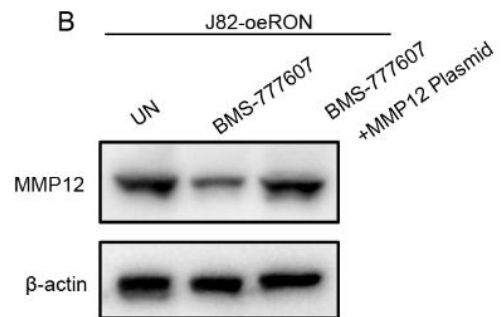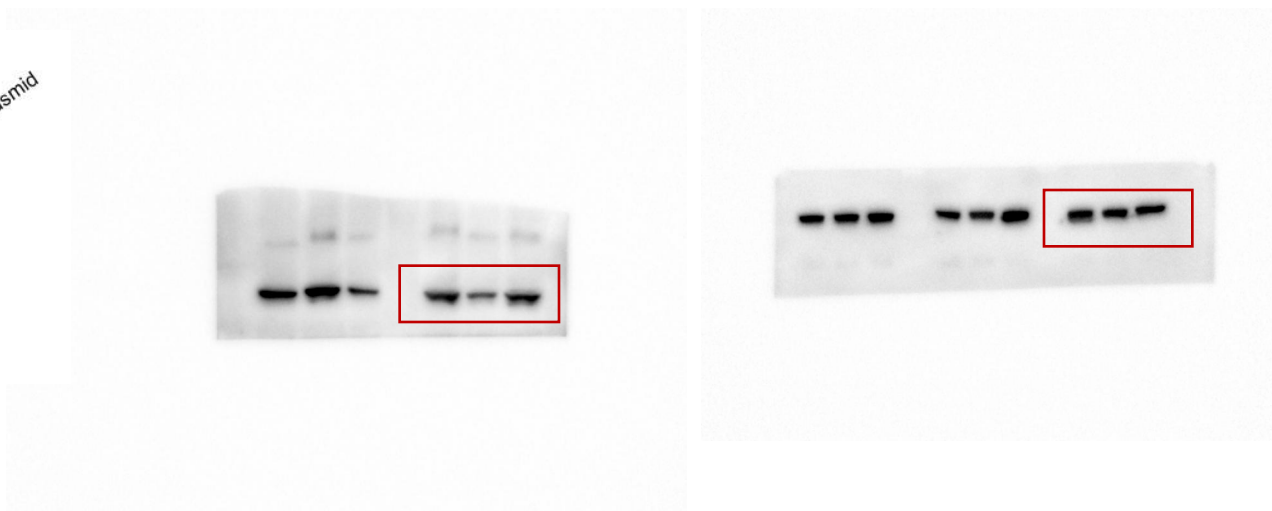

# Supplementary Figure 2

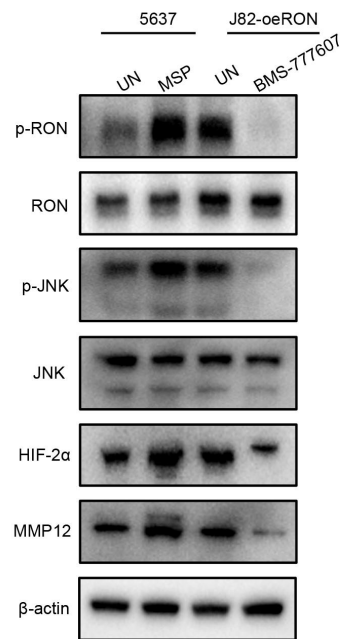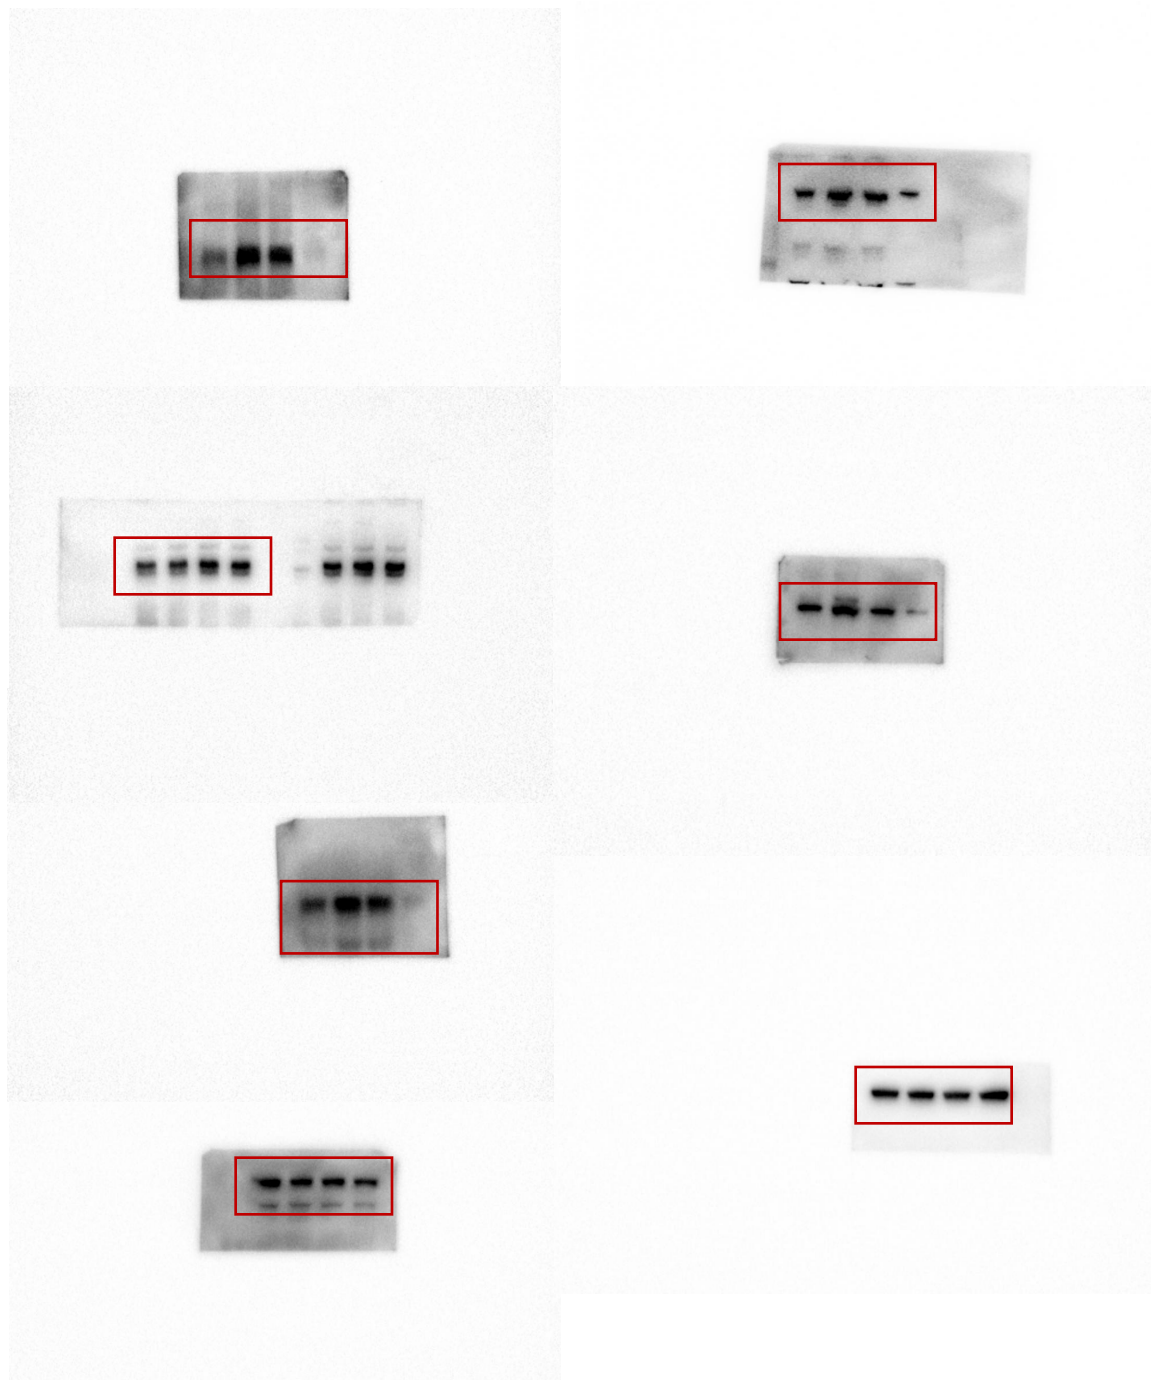

# Supplementary Figure 3

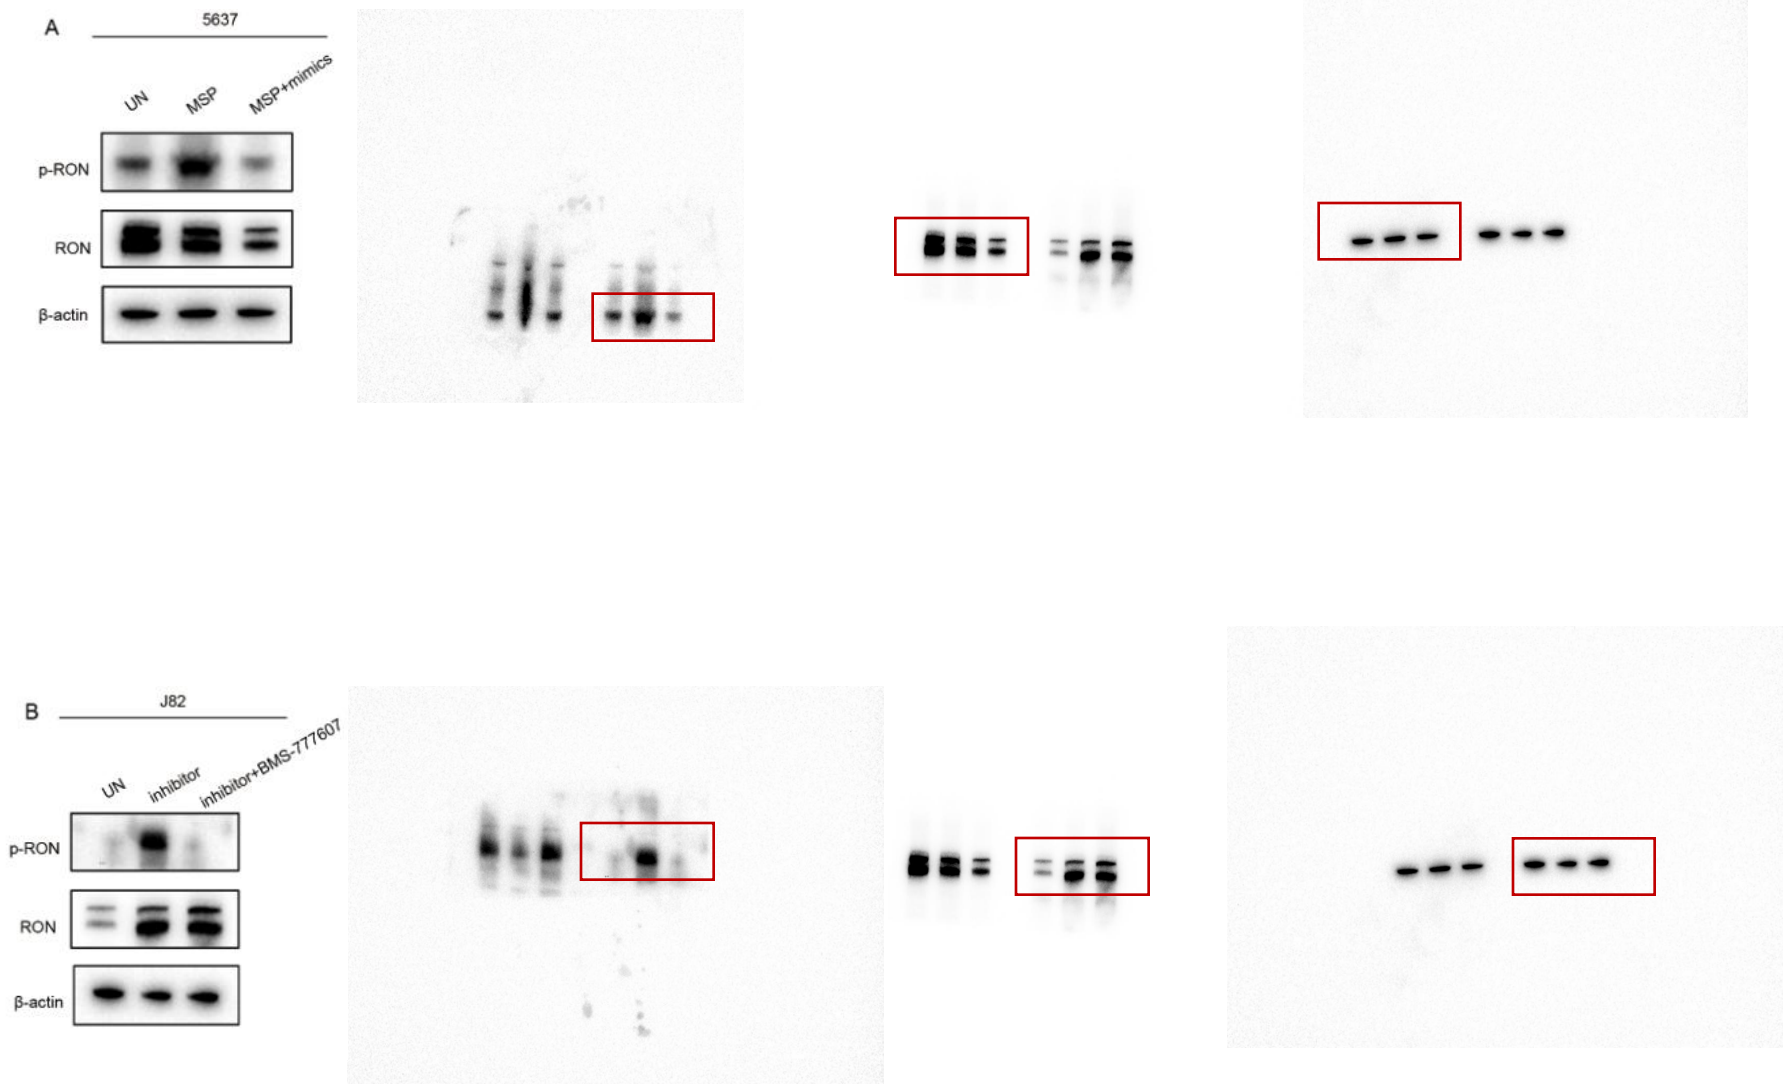

Supplement: 41419_2024_7245_MOESM3_ESM.pdf [file 41419_2024_7245_MOESM3_ESM.pdf]
